# Supplementary material
Source: publisher figshare collection journal article supplement (https://frontiersin.figshare.com/ndownloader/files/31389817)
Supplement: Supplementary file [file 31389817]

**Table S2 - overview of hepatic ontology search result and the selection of parent gene ontologies**

included = ontology included

is part\_of = ontology not included because it is part of another included parent ontology

not within scope = not included because not specific to adipose tissue in humans

| Selection        | GO ID      | GO term                                                       |
|------------------|------------|---------------------------------------------------------------|
| is part_of       | GO:0060344 | liver trabecula formation                                     |
| is part_of       | GO:0097421 | liver regeneration                                            |
| not within scope | GO:1990402 | embryonic liver development                                   |
| is part_of       | GO:0071910 | determination of liver left/right asymmetry                   |
| is part_of       | GO:0072575 | epithelial cell proliferation involved in liver morphogenesis |
| is part_of       | GO:0072576 | liver morphogenesis                                           |
| included         | GO:0001889 | liver development                                             |
| not within scope | GO:0015234 | thiamine transmembrane transporter activity                   |
| not within scope | GO:0015127 | bilirubin transmembrane transporter activity                  |
| is part_of       | GO:0090320 | regulation of chylomicron remnant clearance                   |
| is part_of       | GO:0090321 | positive regulation of chylomicron remnant clearance          |
| not within scope | GO:0051413 | response to cortisone                                         |
| included         | GO:0036333 | hepatocyte homeostasis                                        |
| not within scope | GO:0036378 | calcitriol biosynthetic process from calciol                  |
| not within scope | GO:0061011 | hepatic duct development                                      |
| not within scope | GO:0061009 | common bile duct development                                  |
| not within scope | GO:2001069 | glycogen binding                                              |
| not within scope | GO:0014831 | gastro-intestinal system smooth muscle contraction            |
| is part_of       | GO:0035622 | intrahepatic bile duct development                            |
| not within scope | GO:0045122 | aflatoxin biosynthetic process                                |
| is part_of       | GO:0070365 | hepatocyte differentiation                                    |
| is part_of       | GO:0070367 | negative regulation of hepatocyte differentiation             |
| is part_of       | GO:0070366 | regulation of hepatocyte differentiation                      |
| is part_of       | GO:0070368 | positive regulation of hepatocyte differentiation             |
| not within scope | GO:0030975 | thiamine binding                                              |
| not within scope | GO:0048175 | hepatocyte growth factor biosynthetic process                 |
| not within scope | GO:0009228 | thiamine biosynthetic process                                 |
| not within scope | GO:0009230 | thiamine catabolic process                                    |
| not within scope | GO:0034363 | intermediate-density lipoprotein particle                     |
| not within scope | GO:0034362 | low-density lipoprotein particle                              |
| not within scope | GO:0034361 | very-low-density lipoprotein particle                         |
| not within scope | GO:0034360 | chylomicron remnant                                           |
| not within scope | GO:0034364 | high-density lipoprotein particle                             |
| included         | GO:0034382 | chylomicron remnant clearance                                 |
| included         | GO:0034379 | very-low-density lipoprotein particle assembly                |
| not within scope | GO:0006772 | thiamine metabolic process                                    |
| not within scope | GO:0004806 | triglyceride lipase activity                                  |
| not within scope | GO:0097330 | response to 5-fluoro-2'-deoxyuridine                          |
| included         | GO:0097284 | hepatocyte apoptotic process                                  |
| not within scope | GO:0043639 | benzoate catabolic process                                    |
| not within scope | GO:0043691 | reverse cholesterol transport                                 |
| not within scope | GO:0018952 | parathion metabolic process                                   |
| not within scope | GO:0018874 | benzoate metabolic process                                    |

|                  |            |                                                                               |
|------------------|------------|-------------------------------------------------------------------------------|
| not within scope | GO:0042199 | cyanuric acid metabolic process                                               |
| included         | GO:1990828 | hepatocyte dedifferentiation                                                  |
| included         | GO:1990922 | hepatic stellate cell proliferation                                           |
| not within scope | GO:0003046 | regulation of systemic arterial blood pressure by stress relaxation           |
| not within scope | GO:0002251 | organ or tissue specific immune response                                      |
| included         | GO:0002194 | hepatocyte cell migration                                                     |
| not within scope | GO:0002542 | Factor XII activation                                                         |
| not within scope | GO:0002337 | B-1a B cell differentiation                                                   |
| included         | GO:0002384 | hepatic immune response                                                       |
| not within scope | GO:0071388 | cellular response to cortisone stimulus                                       |
| not within scope | GO:0046222 | aflatoxin metabolic process                                                   |
| not within scope | GO:0046223 | aflatoxin catabolic process                                                   |
| not within scope | GO:0007503 | fat body development                                                          |
| not within scope | GO:0071934 | thiamine transmembrane transport                                              |
| is part_of       | GO:0072574 | hepatocyte proliferation                                                      |
| not within scope | GO:0015888 | thiamine transport                                                            |
| not within scope | GO:0019339 | parathion catabolic process                                                   |
| is part_of       | GO:1904898 | negative regulation of hepatic stellate cell proliferation                    |
| is part_of       | GO:1904897 | regulation of hepatic stellate cell proliferation                             |
| is part_of       | GO:1904899 | positive regulation of hepatic stellate cell proliferation                    |
| included         | GO:0061521 | hepatic stellate cell differentiation                                         |
| included         | GO:0061872 | hepatic stellate cell contraction                                             |
| is part_of       | GO:0061873 | regulation of hepatic stellate cell contraction                               |
| is part_of       | GO:0061874 | positive regulation of hepatic stellate cell contraction                      |
| is part_of       | GO:0061875 | negative regulation of hepatic stellate cell contraction                      |
| is part_of       | GO:0061870 | positive regulation of hepatic stellate cell migration                        |
| is part_of       | GO:0061871 | negative regulation of hepatic stellate cell migration                        |
| is part_of       | GO:0061869 | regulation of hepatic stellate cell migration                                 |
| included         | GO:0061868 | hepatic stellate cell migration                                               |
| not within scope | GO:0061007 | hepaticobiliary system process                                                |
| not within scope | GO:0061008 | hepaticobiliary system development                                            |
| included         | GO:0035733 | hepatic stellate cell activation                                              |
| is part_of       | GO:2000491 | positive regulation of hepatic stellate cell activation                       |
| is part_of       | GO:2000490 | negative regulation of hepatic stellate cell activation                       |
| is part_of       | GO:2000489 | regulation of hepatic stellate cell activation                                |
| not within scope | GO:0010901 | regulation of very-low-density lipoprotein particle remodeling                |
| not within scope | GO:0010903 | negative regulation of very-low-density lipoprotein particle remodeling       |
| not within scope | GO:0010902 | positive regulation of very-low-density lipoprotein particle remodeling       |
| not within scope | GO:0034369 | plasma lipoprotein particle remodeling                                        |
| not within scope | GO:0034374 | low-density lipoprotein particle remodeling                                   |
| not within scope | GO:0034372 | very-low-density lipoprotein particle remodeling                              |
| not within scope | GO:0034375 | high-density lipoprotein particle remodeling                                  |
| not within scope | GO:0004454 | ketohexokinase activity                                                       |
| is part_of       | GO:2000346 | negative regulation of hepatocyte proliferation                               |
| is part_of       | GO:2000345 | regulation of hepatocyte proliferation                                        |
| is part_of       | GO:2000347 | positive regulation of hepatocyte proliferation                               |
| not within scope | GO:0036458 | hepatocyte growth factor binding                                              |
| not within scope | GO:2001113 | negative regulation of cellular response to hepatocyte growth factor stimulus |
| not within scope | GO:2001114 | positive regulation of cellular response to hepatocyte growth factor stimulus |
| not within scope | GO:2001112 | regulation of cellular response to hepatocyte growth factor stimulus          |

|                  |            |                                                                            |
|------------------|------------|----------------------------------------------------------------------------|
| not within scope | GO:0035729 | cellular response to hepatocyte growth factor stimulus                     |
| not within scope | GO:0035728 | response to hepatocyte growth factor                                       |
| not within scope | GO:0048178 | negative regulation of hepatocyte growth factor biosynthetic process       |
| not within scope | GO:0048177 | positive regulation of hepatocyte growth factor biosynthetic process       |
| not within scope | GO:0048176 | regulation of hepatocyte growth factor biosynthetic process                |
| not within scope | GO:0048012 | hepatocyte growth factor receptor signaling pathway                        |
| not within scope | GO:0005008 | hepatocyte growth factor-activated receptor activity                       |
| not within scope | GO:0005171 | hepatocyte growth factor receptor binding                                  |
| not within scope | GO:1902202 | regulation of hepatocyte growth factor receptor signaling pathway          |
| not within scope | GO:1902203 | negative regulation of hepatocyte growth factor receptor signaling pathway |
| not within scope | GO:1902204 | positive regulation of hepatocyte growth factor receptor signaling pathway |
| not within scope | GO:0032726 | positive regulation of hepatocyte growth factor production                 |
| not within scope | GO:0032646 | regulation of hepatocyte growth factor production                          |
| not within scope | GO:0032686 | negative regulation of hepatocyte growth factor production                 |
| not within scope | GO:0032605 | hepatocyte growth factor production                                        |
| is part_of       | GO:1903944 | negative regulation of hepatocyte apoptotic process                        |
| is part_of       | GO:1903945 | positive regulation of hepatocyte apoptotic process                        |
| is part_of       | GO:1903943 | regulation of hepatocyte apoptotic process                                 |
| is part_of       | GO:0015126 | canalicular bile acid transmembrane transporter activity                   |
| included         | GO:0033675 | pericanalicular vesicle                                                    |
| is part_of       | GO:0061017 | hepatoblast differentiation                                                |
| included         | GO:0015722 | canalicular bile acid transport                                            |
